# Supplementary material for: Ferromagnetism above 1000 K in a highly cation-ordered double-perovskite insulator Sr3OsO6
Source: PubMed Central journal article supplement (PMC6372617; doi:10.1038/s41467-019-08440-6), 2019-02-12
Supplement: 41467_2019_8440_MOESM1_ESM.pdf [file 41467_2019_8440_MOESM1_ESM.pdf]

Supplementary Information

**Ferromagnetism above 1000 K in a highly cation-ordered double-perovskite insulator  $\text{Sr}_3\text{OsO}_6$**

Wakabayashi et al.

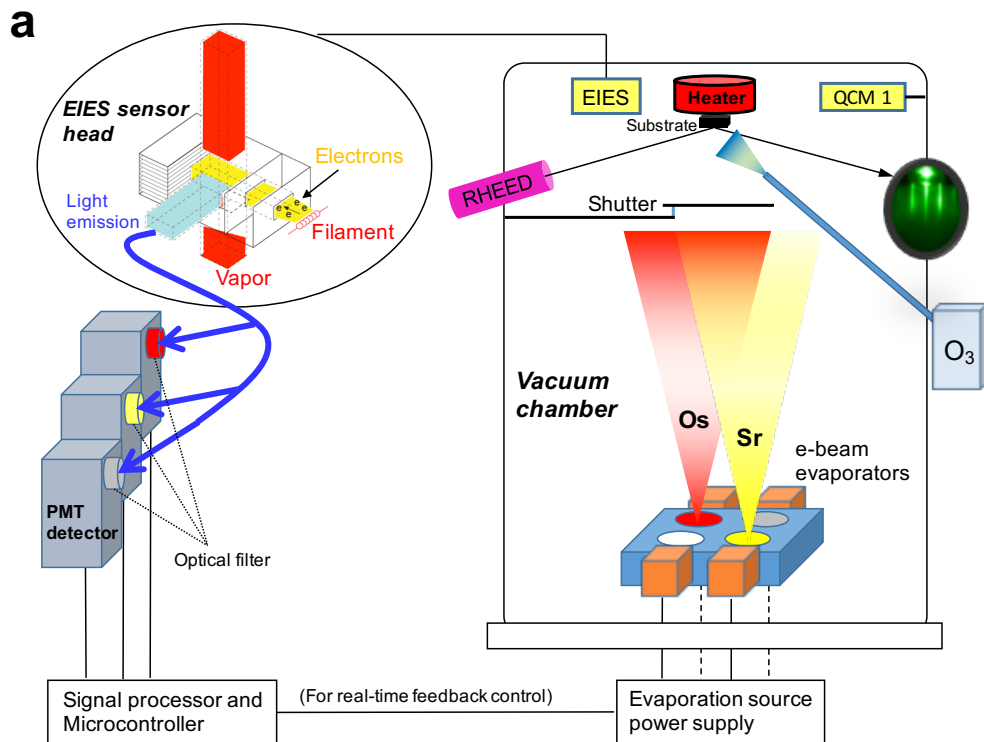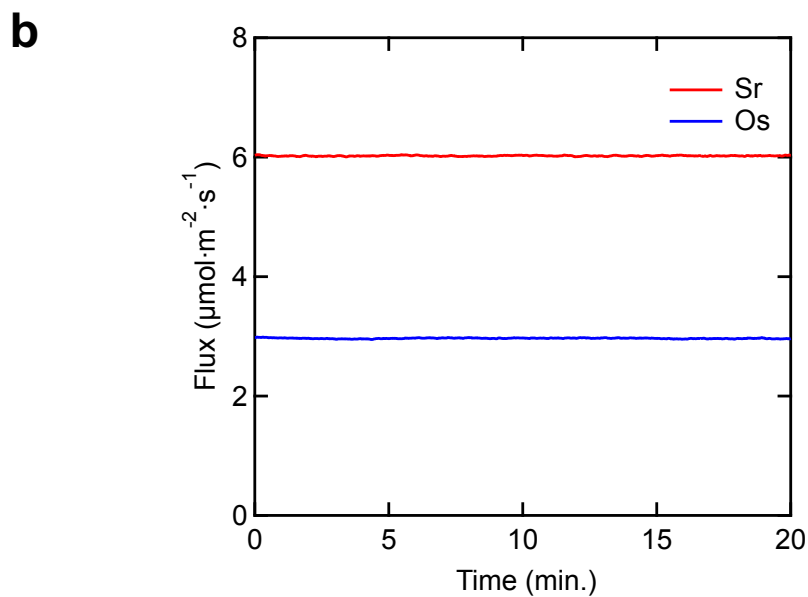

**Supplementary Figure 1 Multi-source oxide MBE setup and fluxes.** **a**, Schematic illustration of our multi-source oxide MBE setup. EIES: electron impact emission spectroscopy. QCM: quartz crystal microbalance. RHEED: reflection high-energy electron diffraction. PMT: photomultiplier tube. **b**, Sr and Os fluxes measured by EIES during the growth.

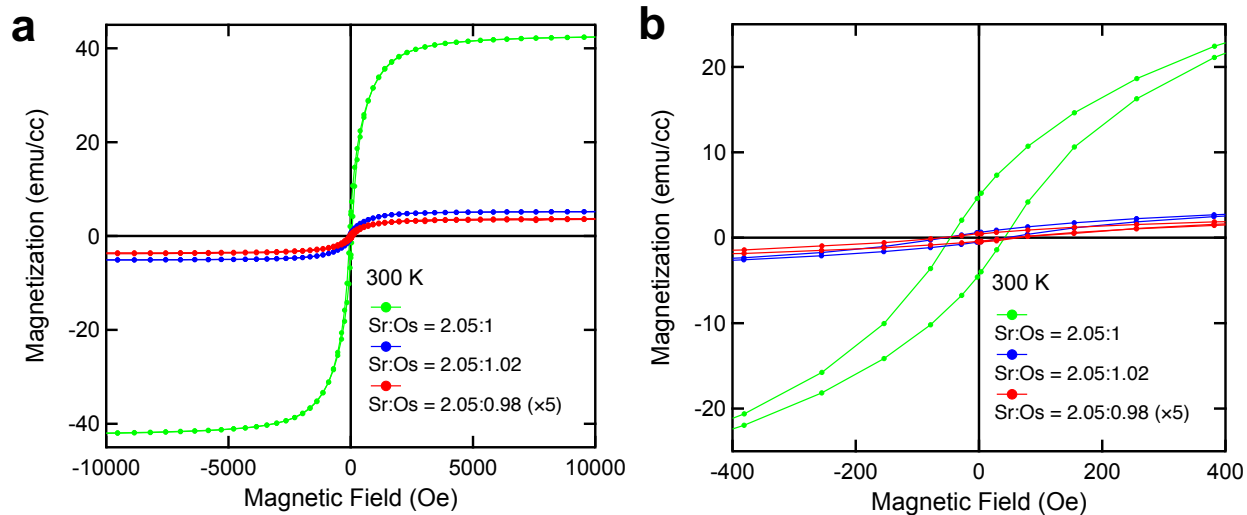

**Supplementary Figure 2 Magnetic properties of  $\text{Sr}_3\text{OsO}_6$  films grown with different flux ratios of Sr and Os.** **a**, In-plane  $M$ - $H$  curves at 300 K for  $\text{Sr}_3\text{OsO}_6$  films grown with different flux ratios of Sr and Os. Here,  $H$  was applied to the  $[100]$  direction. **b**, Close-up near the zero magnetic field in **a**.

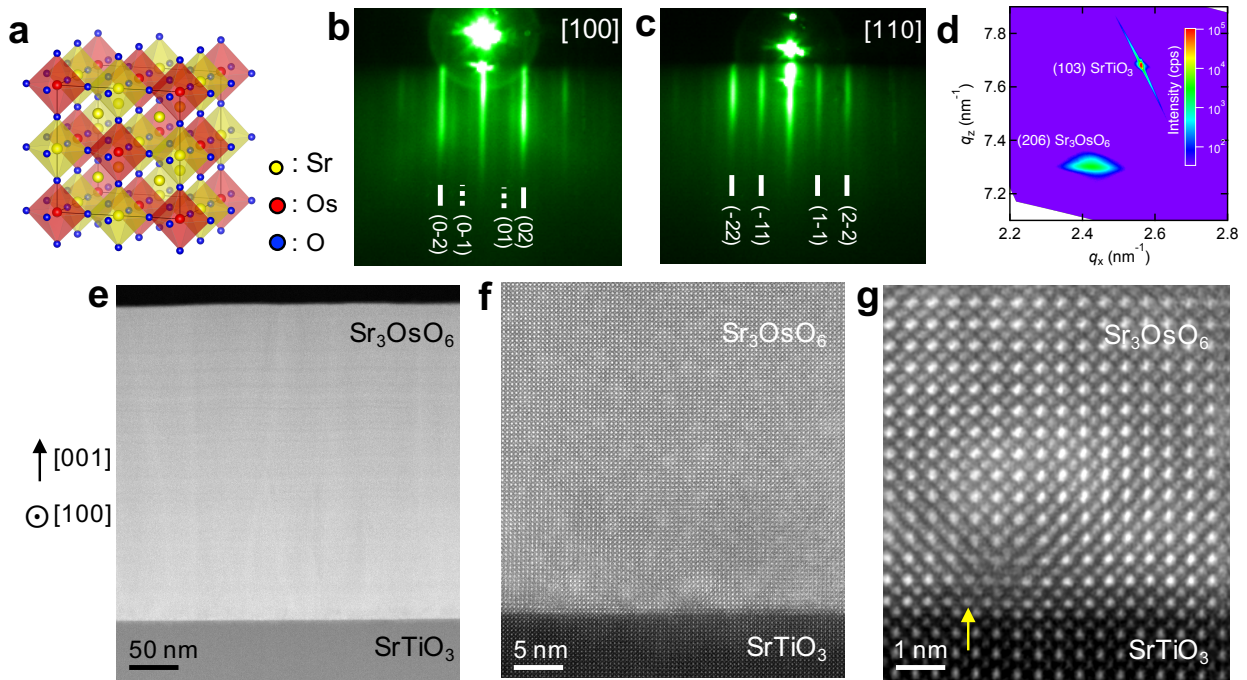

**Supplementary Figure 3 Crystal structure, RHEED, X-ray HRRSM and HAADF-STEM for a  $\text{Sr}_3\text{OsO}_6$  film.** **a**, Schematic diagram of the B-site ordered double-perovskite  $\text{Sr}_3\text{OsO}_6$ . The yellow, red and blue spheres indicate Sr, Os and O ions, respectively. **b**, **c**, RHEED patterns of an epitaxial  $\text{Sr}_3\text{OsO}_6$  film surface, where the incident electron beams are parallel to  $[100]$  (**b**) and  $[110]$  (**c**). **d**, X-ray HRRSM of a  $\text{Sr}_3\text{OsO}_6$  film around the  $\text{SrTiO}_3$  (103) reflection. **e**, Cross-sectional HAADF-STEM images of a  $\text{Sr}_3\text{OsO}_6$  film taken along the  $[100]$  direction. **f**, Magnified image near the interface in **e**. **g**, Magnified image near the interface in **f**. In **g**, a misfit dislocation at the  $\text{Sr}_3\text{OsO}_6/\text{SrTiO}_3$  interface is indicated by the yellow arrow.



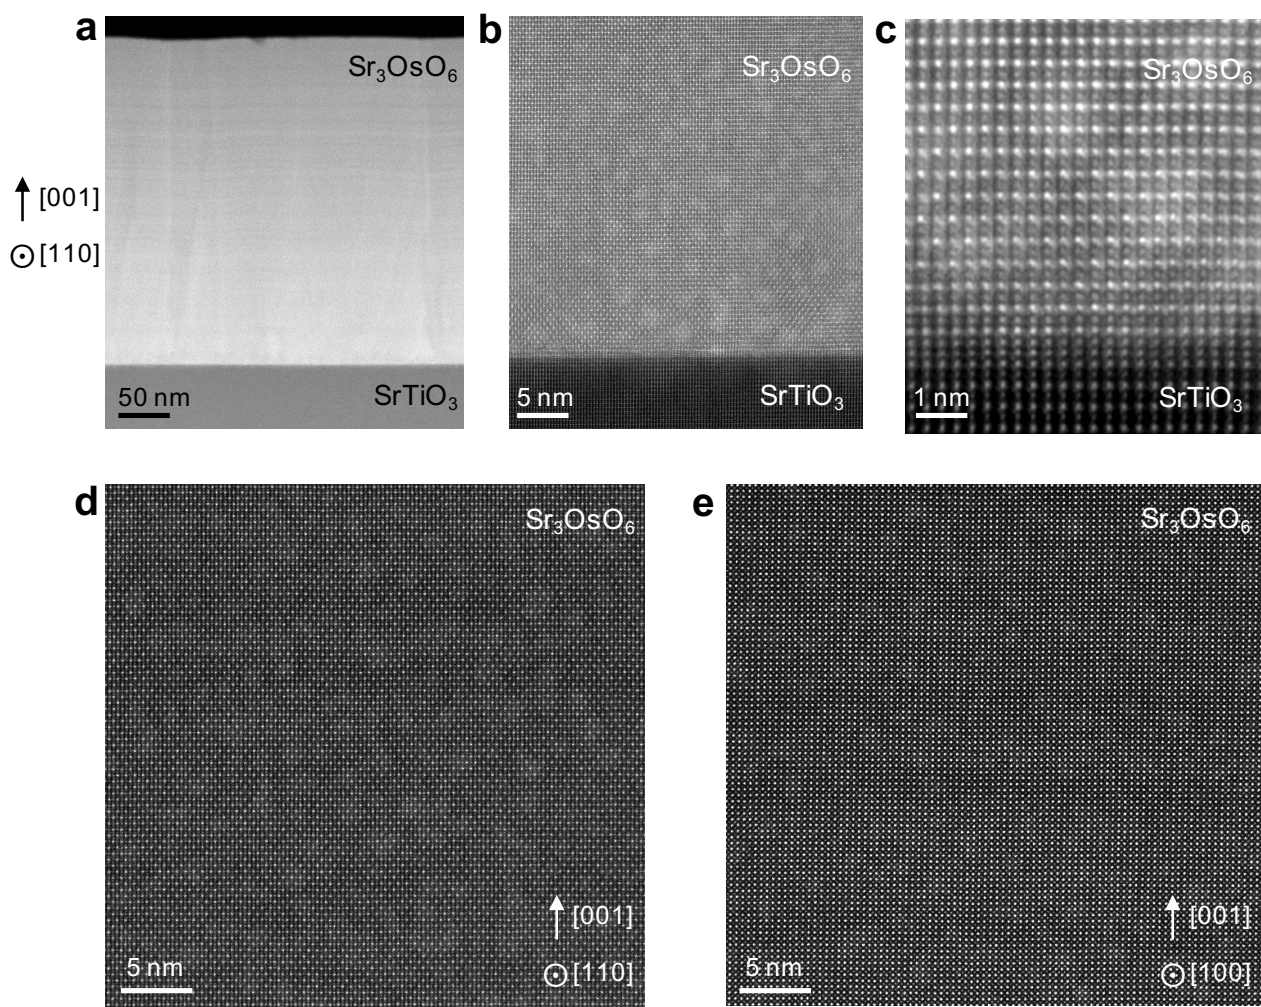

**Supplementary Figure 4 STEM images for a  $\text{Sr}_3\text{OsO}_6$  film.** **a**, Cross-sectional HAADF-STEM image of a  $\text{Sr}_3\text{OsO}_6$  film taken along the  $[110]$  direction. **b**, Magnified image near the interface in **a**. **c**, Magnified image near the interface in **b**. **d**, **e**, HAADF-STEM images of the  $\text{Sr}_3\text{OsO}_6$  layer taken along the  $[110]$  (**d**) and  $[100]$  (**e**) directions.

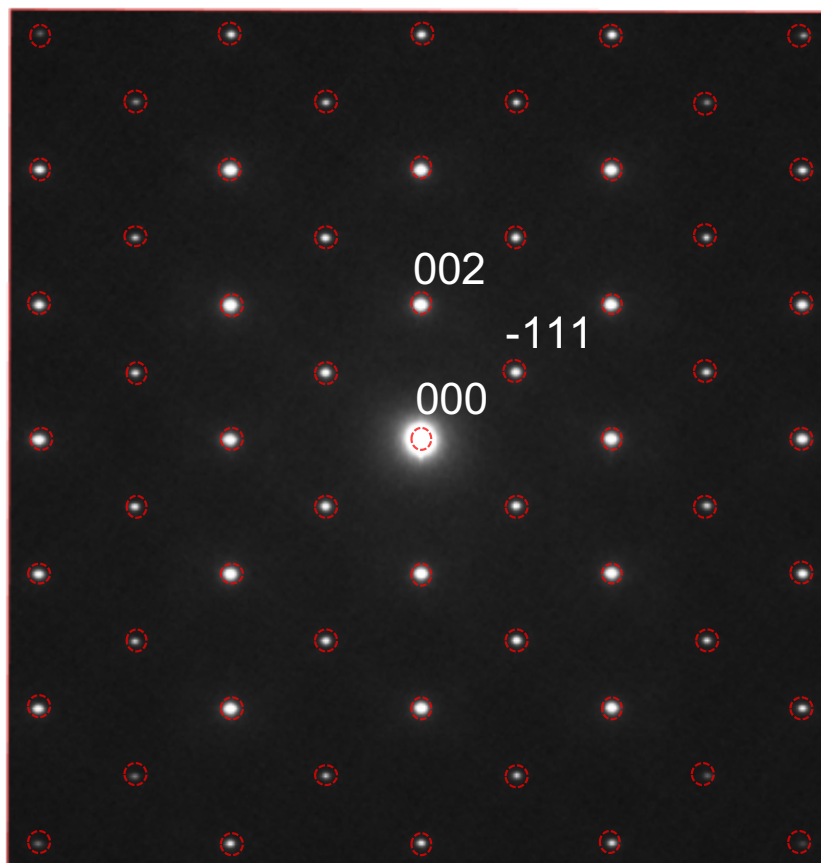

**Supplementary Figure 5 TED pattern for a  $\text{Sr}_3\text{OsO}_6$  film.** TED pattern for a  $\text{Sr}_3\text{OsO}_6$  film taken along the  $[110]$  axis. The red dashed circles represent calculated diffraction pattern obtained by the Fourier transform of the ideal cubic B-site ordered double-perovskite structure.

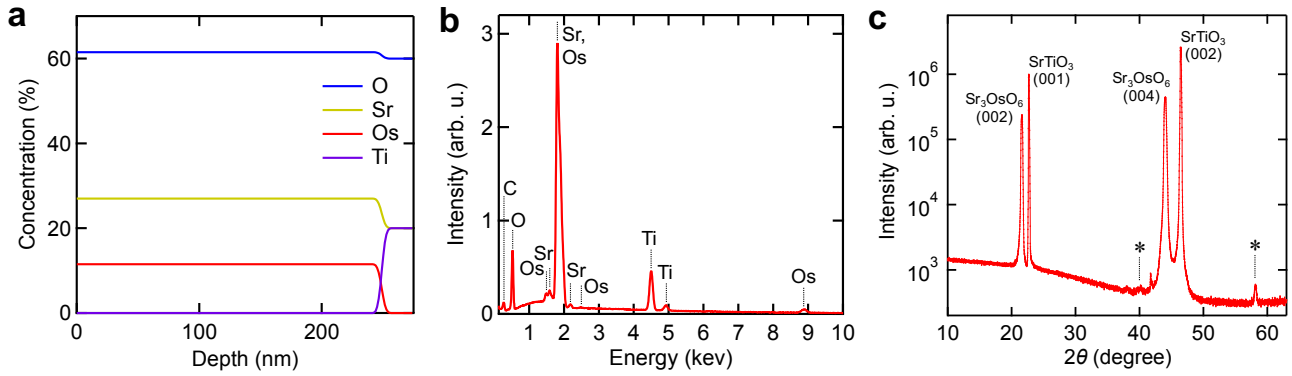

**Supplementary Figure 6 Chemical composition, EDS spectrum and  $\theta$ - $2\theta$  XRD pattern of Sr<sub>3</sub>OsO<sub>6</sub> films.** **a**, Depth profile of the chemical composition of a Sr<sub>3</sub>OsO<sub>6</sub> film (250-nm thick) estimated from RBS. **b**, EDS spectrum of a Sr<sub>3</sub>OsO<sub>6</sub> film, which was taken from a wide area (1 × 1 mm<sup>2</sup>). **c**,  $\theta$ - $2\theta$  XRD pattern for a Sr<sub>3</sub>OsO<sub>6</sub> film. Traces of OsO<sub>2</sub> are detected as indicated by \*.

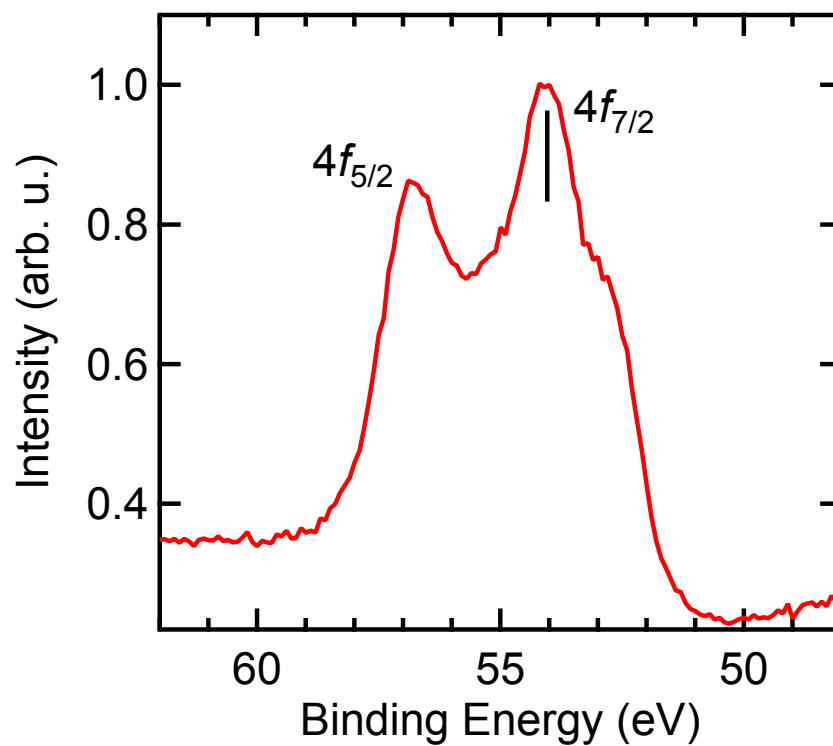

**Supplementary Figure 7 XPS of a Sr<sub>3</sub>OsO<sub>6</sub> film.** The Os 4f XPS spectrum of a Sr<sub>3</sub>OsO<sub>6</sub> film at 300 K.

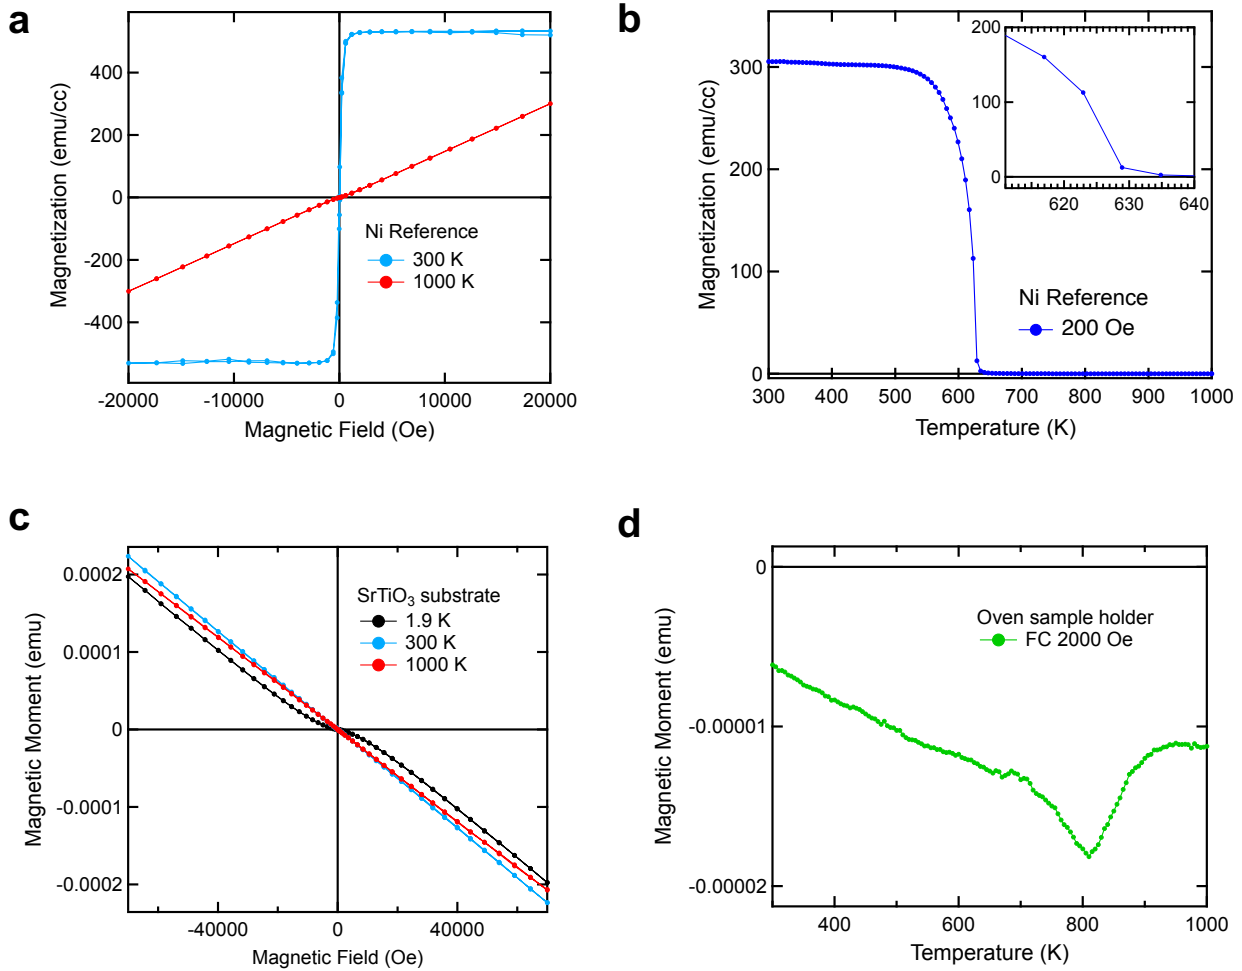

**Supplementary Figure 8 Magnetic properties of a Ni reference plate and a SrTiO<sub>3</sub> substrate, and experimental artifact from oven sample holder. a**,  $M$ - $H$  curve at 300 and 1000 K for a Ni plate. Here,  $H$  was applied to the in-plane direction. **b**,  $M$ - $T$  curve with  $H = 200$  Oe applied to the in-plane direction for a Ni plate. The inset of **b** shows a close-up near the Curie temperature. **c**, In-plane  $M$ - $H$  curve at 1.9, 300 and 1000 K for a SrTiO<sub>3</sub> substrate. Here,  $H$  was applied to the [100] direction. **d**, In-plane  $M$ - $H$  curve at  $M$ - $T$  curve with  $H = 2000$  Oe for the oven sample holder without a sample.

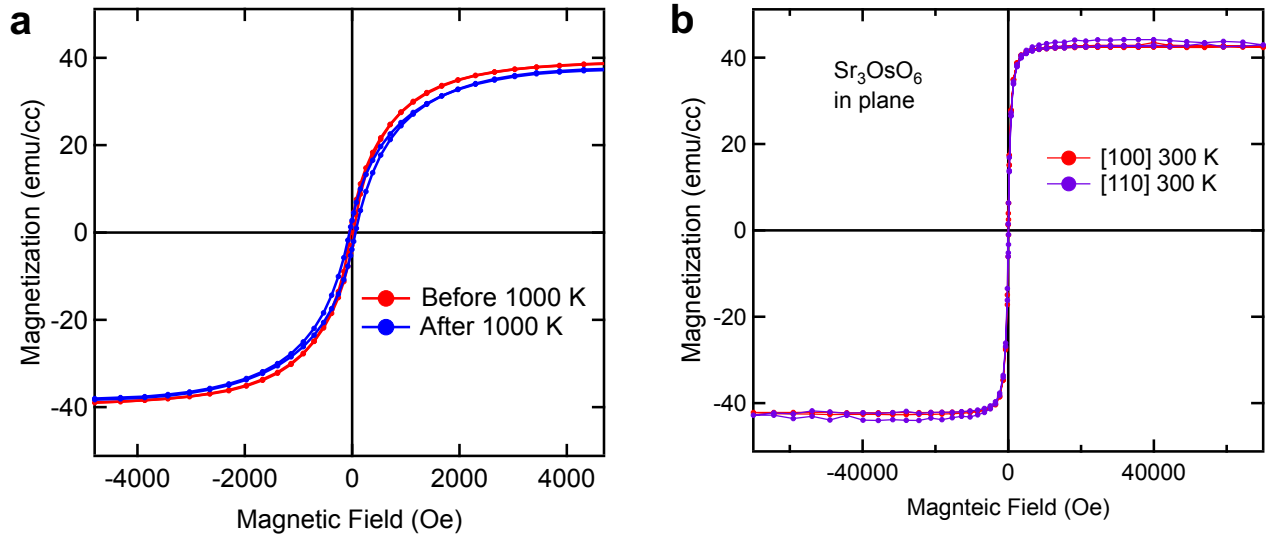

**Supplementary Figure 9 Magnetic properties of a  $\text{Sr}_3\text{OsO}_6$  film after heating and magnetic properties of a  $\text{Sr}_3\text{OsO}_6$  film with  $H$  applied to the  $[100]$  and  $[110]$  directions. a,** In-plane  $M$ - $H$  curves of a  $\text{Sr}_3\text{OsO}_6$  film at 300 K before and after the sample was heated to 1000 K. Here,  $H$  was applied to the  $[100]$  direction. **b,** In-plane  $M$ - $H$  curves at 300 K for a  $\text{Sr}_3\text{OsO}_6$  film. Here,  $H$  was applied to the  $[100]$  or  $[110]$  direction.

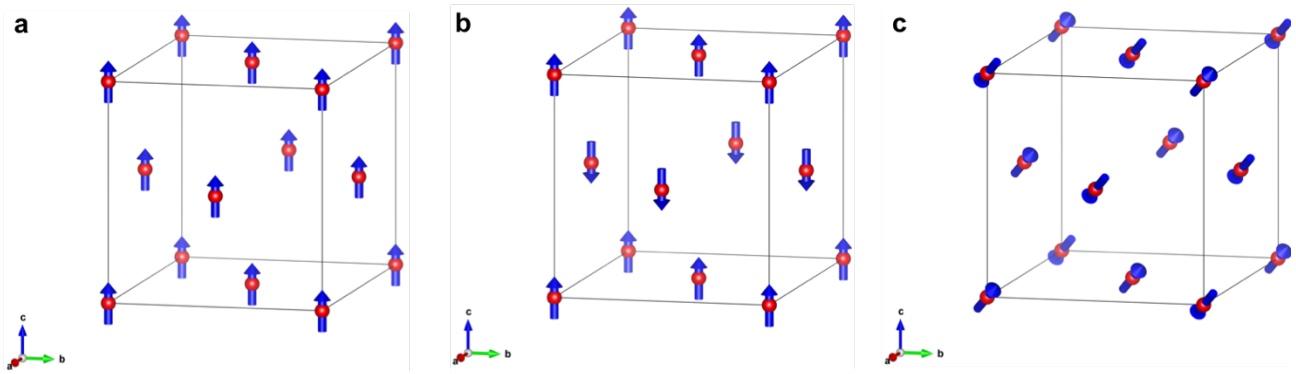

**Supplementary Figure 10 Schematic diagrams of the magnetic orders.** **a, b, c,** Schematic diagram of the collinear FM order (**a**), the (001) AFM order (**b**) and the (111) AFM order (**c**). In the diagrams, red spheres and blue arrows indicate Os atoms and Os magnetic moments, respectively, and the Sr and O atoms are omitted for simplicity.

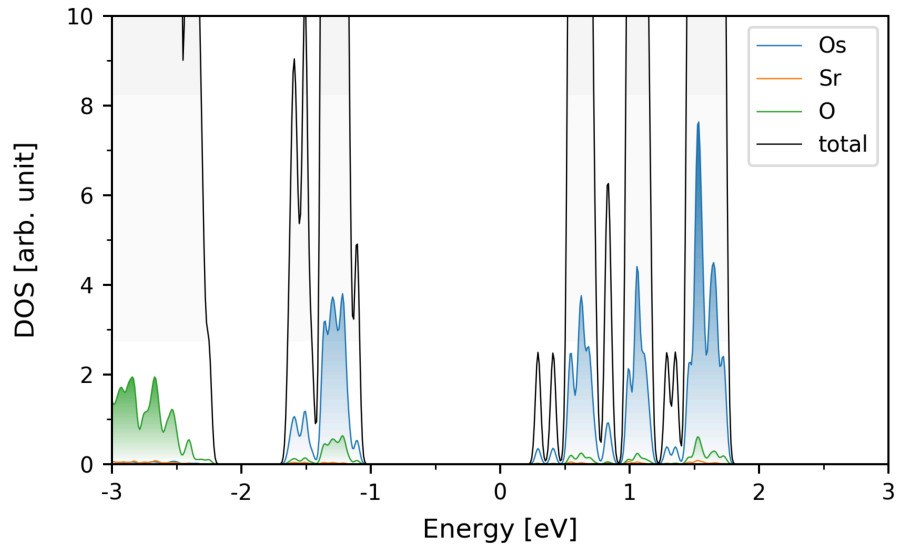

**Supplementary Figure 11 Electronic structure calculation with the HSE functional.** The element-specific PDOS for the canted FM order calculated by the HSE + SOC method. Here, blue, orange and green curves indicate the density-of-states per one Os, Sr and O atoms, respectively.
